# Supplementary material
Source: PubMed Central journal article supplement (PMC7066985)
Supplement: NIHMS1562394-supplement-Supplementary_Data.pdf [file NIHMS1562394-supplement-Supplementary_Data.pdf]

## SUPPLEMENTAL TABLES

| <b>Supplemental Table 1. The impact of local failure on nodal or distant failure.</b> |               |                                          |          |          |
|---------------------------------------------------------------------------------------|---------------|------------------------------------------|----------|----------|
| Histology                                                                             | Local Failure | Proportion with Nodal or Distant Failure | 95% L    | 95% U    |
| <b>Overall</b>                                                                        | Yes           | 0.541667                                 | 0.420044 | 0.659754 |
| <b>Overall</b>                                                                        | No            | 0.211078                                 | 0.180717 | 0.244016 |
| <b>SqCC</b>                                                                           | Yes           | 0.484849                                 | 0.307963 | 0.664556 |
| <b>SqCC</b>                                                                           | No            | 0.181319                                 | 0.128221 | 0.245106 |
| <b>Adeno</b>                                                                          | Yes           | 0.611111                                 | 0.357451 | 0.827014 |
| <b>Adeno</b>                                                                          | No            | 0.244444                                 | 0.189775 | 0.305981 |
| <b>Unknown</b>                                                                        | Yes           | 0.631579                                 | 0.383578 | 0.837114 |
| <b>Unknown</b>                                                                        | No            | 0.166667                                 | 0.118268 | 0.225035 |
| <b>NSCLC-NOS</b>                                                                      | Yes           | -                                        | -        | -        |
| <b>NSCLC-NOS</b>                                                                      | No            | 0.333333                                 | 0.214005 | 0.470648 |

Abbreviations: Adeno, adenocarcinoma; NSCLC-NOS, non-small cell carcinoma, not otherwise specified; SqCC, squamous cell carcinoma.

| Supplemental Table 2. Subgroup analysis in patients receiving 100 Gy BED. |         |         |          |                |
|---------------------------------------------------------------------------|---------|---------|----------|----------------|
|                                                                           | HR      | 95% L   | 95% U    | <i>p</i>       |
| <b>T2 (n=103)</b>                                                         |         |         |          |                |
| <b>Histology</b>                                                          |         |         |          |                |
| <b>SqCC v. Adeno</b>                                                      | 10.345  | 1.39    | 77.015   | <b>0.0225*</b> |
| <b>SqCC v. NSCLC-NOS</b>                                                  | 1.281   | 0.168   | 9.756    | 0.8112         |
| <b>SqCC v. Unknown</b>                                                    | 1.109   | 0.3     | 4.103    | 0.8765         |
| <b>Adeno v. NSCLC-NOS</b>                                                 | 0.124   | 0.008   | 1.875    | 0.1319         |
| <b>Adeno v. Unknown</b>                                                   | 0.107   | 0.012   | 0.984    | <b>0.0484*</b> |
| <b>NSCLC-NOS v. Unknown</b>                                               | 0.866   | 0.091   | 8.245    | 0.9005         |
| <b>T1 (n=231)</b>                                                         |         |         |          |                |
| <b>Histology</b>                                                          |         |         |          |                |
| <b>SqCC v. Adeno</b>                                                      | 1.461   | 0.597   | 3.576    | 0.4064         |
| <b>SqCC v. NSCLC-NOS</b>                                                  | 5012765 | 2104186 | 11941820 | -              |
| <b>SqCC v. Unknown</b>                                                    | 1.476   | 0.609   | 3.577    | 0.3891         |
| <b>Adeno v. NSCLC-NOS</b>                                                 | 3430958 | 1518926 | 7749863  | -              |
| <b>Adeno v. Unknown</b>                                                   | 1.01    | 0.434   | 2.348    | 0.9816         |
| <b>NSCLC-NOS v. Unknown</b>                                               | 0       | 0       | 0        | -              |

Abbreviations: Adeno, adenocarcinoma; NSCLC-NOS, non-small cell carcinoma, not otherwise specified; SqCC, squamous cell carcinoma.

\**p* value of < 0.05 was considered statistically significant.

## **SUPPLEMENTAL FIGURE LEGENDS**

Supplemental Figure 1. Kaplan-Meier estimates of local failure and overall survival in the study population.

Supplemental Figure 2. Estimated cumulative incidence curves of local failure by dose categories in BED.

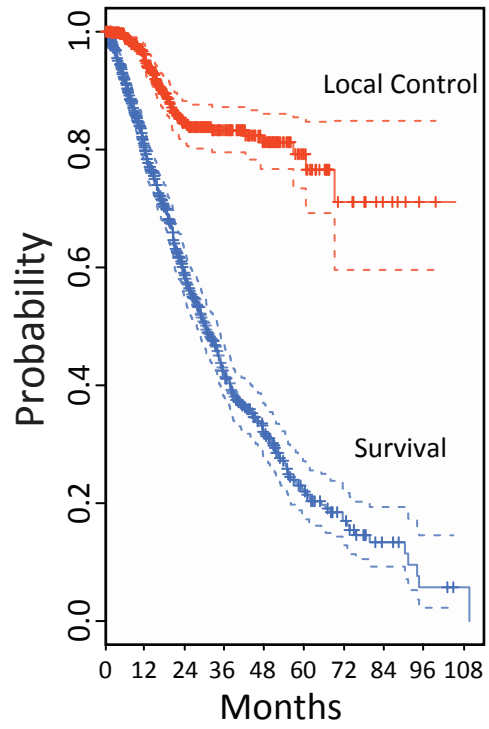

| No. at Risk |                                |
|-------------|--------------------------------|
| LC          | 740 461 262 142 80 36 18 7 3 1 |
| OS          | 740 487 297 159 88 43 25 9 3 1 |

Supplemental Figure 2.

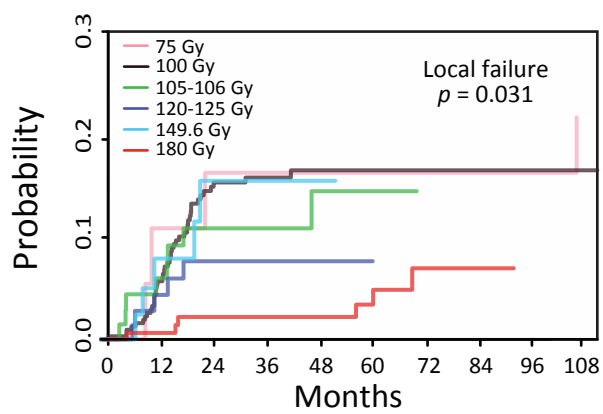

| No. at Risk (local Failure) |     |     |     |    |    |    |    |   |   |   |
|-----------------------------|-----|-----|-----|----|----|----|----|---|---|---|
| 75 Gy                       | 18  | 12  | 6   | 4  | 2  | 1  | 1  | 1 | 1 | 0 |
| 100 Gy                      | 335 | 216 | 113 | 60 | 30 | 13 | 7  | 5 | 2 | 1 |
| 105-106 Gy                  | 70  | 51  | 34  | 19 | 8  | 2  | 0  | 0 | 0 | 0 |
| 120-125 Gy                  | 77  | 45  | 30  | 13 | 7  | 1  | 0  | 0 | 0 | 0 |
| 149.6 Gy                    | 46  | 22  | 6   | 3  | 1  | 0  | 0  | 0 | 0 | 0 |
| 180 Gy                      | 189 | 112 | 70  | 42 | 32 | 19 | 10 | 1 | 0 | 0 |

Supplemental Figure 3.
